# Supplementary material for: Identification and Validation of Potentially Clinically Relevant CpG Regions within the Class 2 Tumor Suppressor Gene SFRP1 in Pancreatic Cancer
Source: MDPI journal article supplement (doi:10.3390/cancers15030683), 2023-01-22
Supplement: s1 [file s1]

## 1 Supplementary

**Table S1.** Primer sequences for RT-PCR and pyrosequencing.

| Method         | Gene  | Direction  | Sequence                         |
|----------------|-------|------------|----------------------------------|
| rtPCR          | SFRP1 | forward    | 5'-AGATGCTTAAGTGTGACAAGTTCC-3'   |
|                |       | reverse    | 5'-TCAGATTTCAACTCGTTGTCACAG-3'   |
|                | ACTB  | forward    | 5'-TGA CGT GGA CAT CCG CAA AG-3' |
|                |       | reverse    | 5'-CTGGAAGGTGGACAGCGAGG-3'       |
| Pyrosequencing | SFRP1 | forward    | 5'-AGGGTTYGGTYGTAGGAGTTT-3'      |
|                |       | reverse    | 5'-ATCCCCCRRACCAATAAC-3'         |
|                |       | sequencing | 5'-TGTAGTTTTYGGAGTTAGTG-3'       |

**Table S2.** Clinico-pathological parameters of the FFPE patient collective with 28 cases of pancreatic ductal adenocarcinomas.

| Category                 | Parameter | n  |
|--------------------------|-----------|----|
| Age at diagnosis         | <50       | 1  |
|                          | 50-59     | 3  |
|                          | 60-69     | 10 |
|                          | 70-79     | 12 |
|                          | 80-89     | 2  |
| Gender                   | Male      | 15 |
|                          | Female    | 13 |
| Histological tumor grade |           |    |
| G                        | 1         | 1  |

|                          |   |    |
|--------------------------|---|----|
|                          | 2 | 12 |
|                          | 3 | 15 |
| Histological tumor stage |   |    |
| pT                       | 1 | 0  |
|                          | 2 | 4  |
|                          | 3 | 23 |
|                          | 4 | 1  |
| pN                       | 0 | 1  |
|                          | 1 | 27 |
| pL                       | 0 | 18 |
|                          | 1 | 9  |
| pV                       | 0 | 23 |
|                          | 1 | 5  |
| Pn                       | 0 | 2  |
|                          | 1 | 25 |

**Table S3.** List of CpG sites per region in *SFRP1* sequence based on TCGA for *in silico* analysis (Infinium HumanMethylation450 BeadChip data).

| Region        | CpG sites                                                                                                                                                                            |
|---------------|--------------------------------------------------------------------------------------------------------------------------------------------------------------------------------------|
| 5' CpGs       | cg07122178, cg23359714, cg00930833, cg09410389, cg03575666, cg01074584, cg07935886, cg14824386, cg06166767, cg00000321, cg03133371, cg14904908, cg04255616                           |
| Island 2 CpGs | cg10406295, cg17816908, cg21517947, cg01495122, cg24319902, cg22418909, cg15839448                                                                                                   |
| 3' CpGs       | cg13398291, cg02388150, cg14548509, cg16662821, cg21846232, cg06777844, cg13154925, ch,8,969355F, cg16498741, cg17486234, cg02154585, cg23331238, cg07296835, cg25927227, cg16667459 |
